# Supplementary material for: Atmospheric Dynamical Amplification Intensifies Future Extreme Precipitation Risks
Source: Research Square preprint supplement (doi:10.21203/rs.3.rs-6447507/v1), 2025-06-13
Supplement: Supplementary file 1 [file b4a9094f2862bcd01ee08948.docx]

**Supporting Information for**

Atmospheric Dynamical Amplification Intensifies Future Extreme Precipitation Risks

Ping Chang1,2*, Dan Fu2*, Xue Liu1, Frederic S. Castruccio3, Andreas F. Prein3,4, Gokhan Danabasoglu3, Xiaoqi Wang1, Julio Bacmeister3, Qiuying Zhang1, Nan Rosenbloom3, Teagan King3, Susan C. Bates3,5

Corresponding author: [ping@tamu.edu](mailto:ping@tamu.edu); [fudan1991@tamu.edu](mailto:fudan1991@tamu.edu)

**The PDF file includes:**

Figures. S1 to S9

Tables S1 to S2


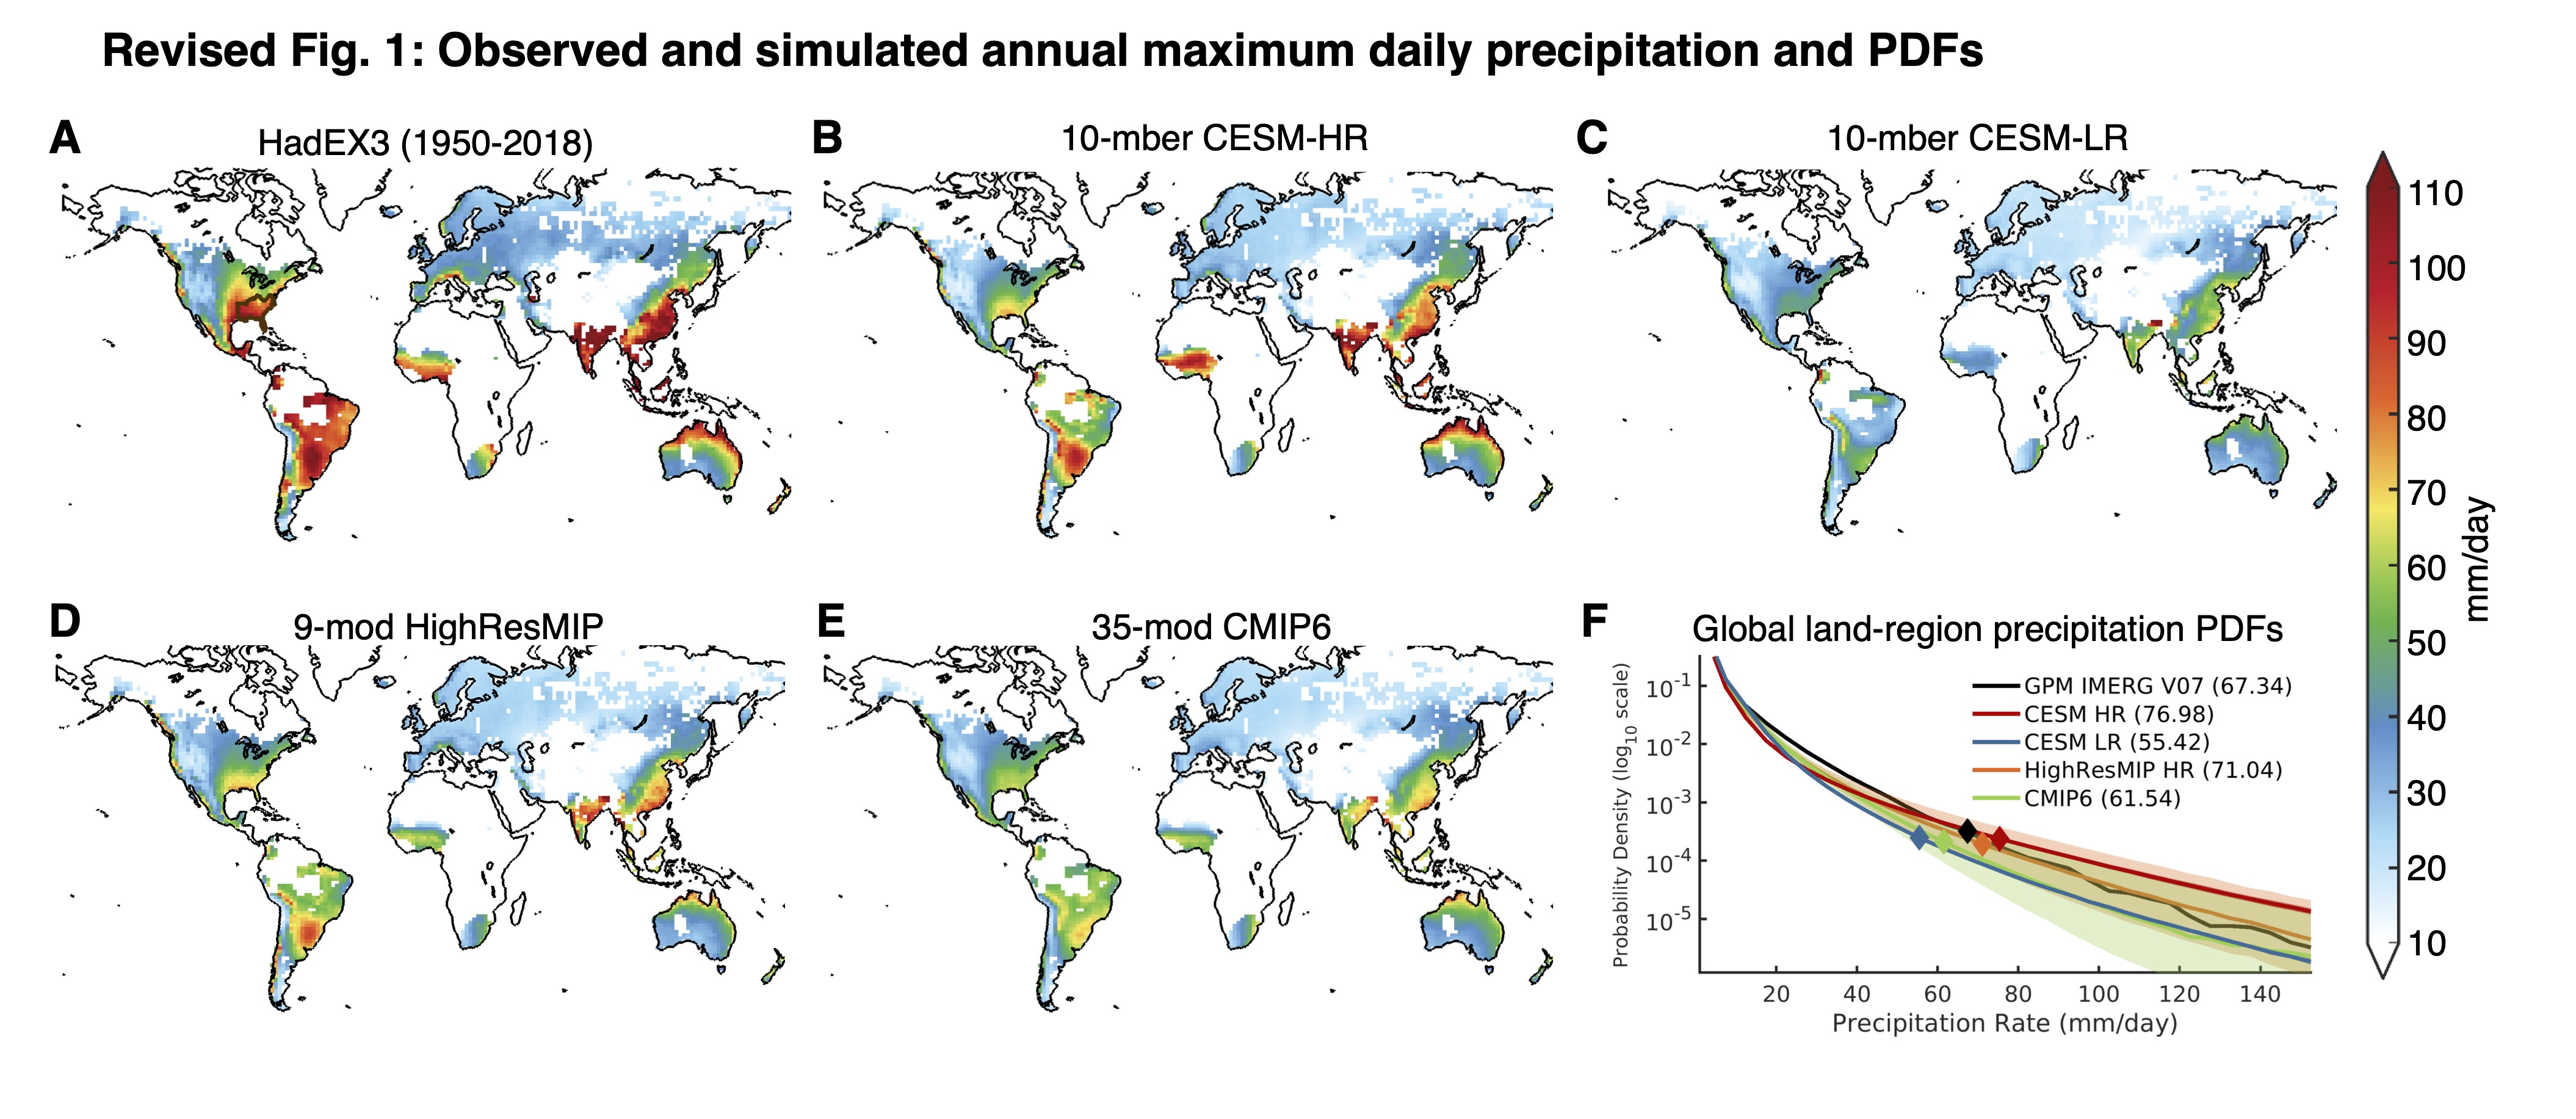


**Fig. S1: Comparison of observed and simulated Rx1day using conservative interpolation method.** Similar to Figure 1, but using conservative interpolation method to remap all data to a common HadEX3 1.875° longitude × 1.25° latitude grid (or 1° × 1°) before computing Rx1day (or PDFs). Global mean Rx1day for HadEX3, CESM-HR, CESM-LR, HighResMIP, and CMIP6 is 61.3 mm/day, 48.9 mm/day, 34.8 mm/day, 45.3 mm/day, and 41.2 mm/day, respectively.


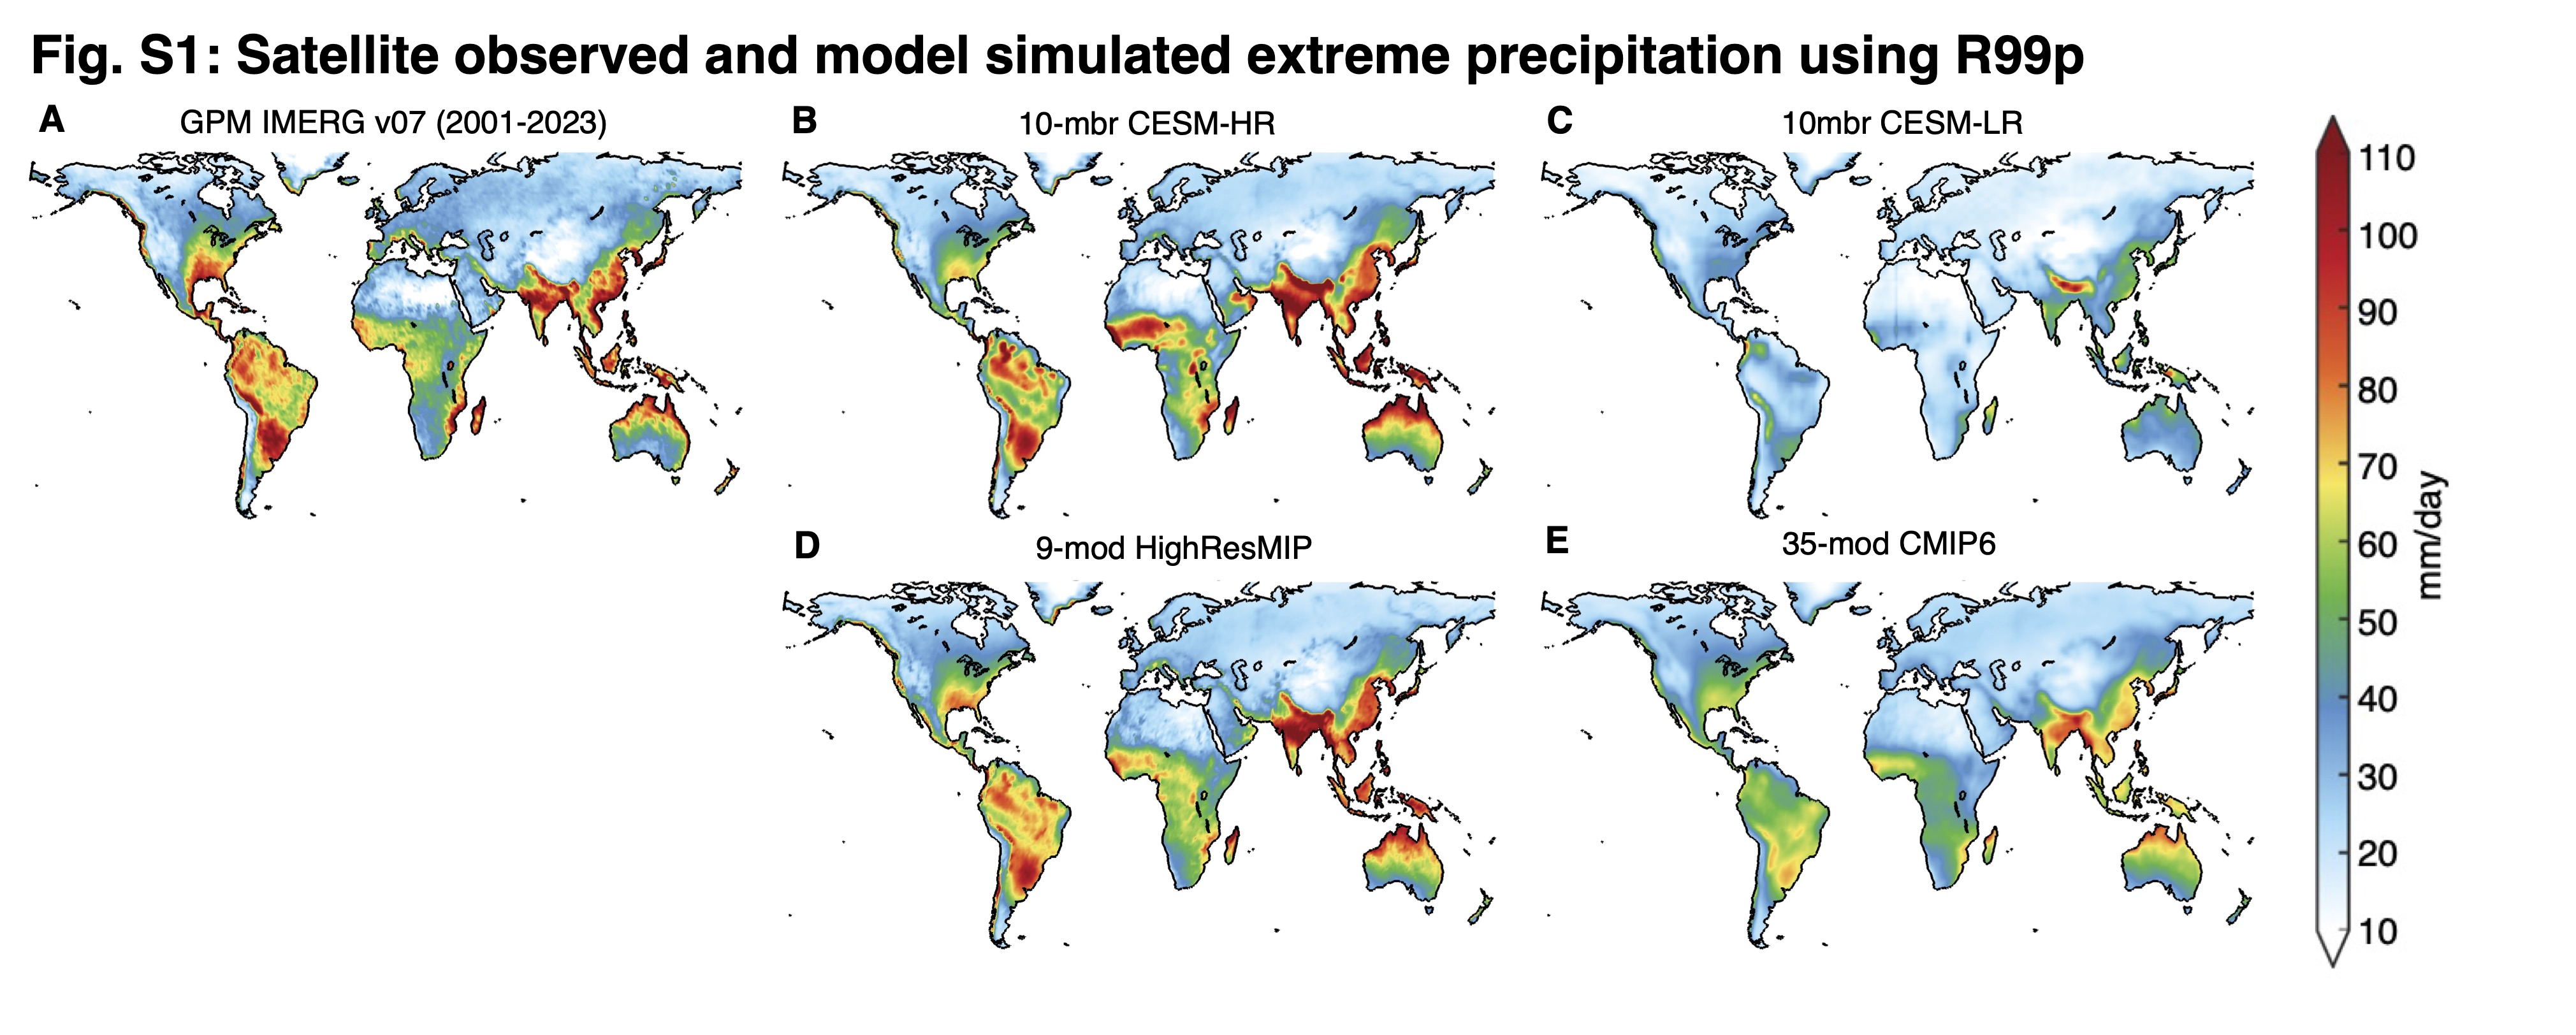


**Fig. S2: Comparison of observed and simulated R99p using bilinear interpolation method. (A)** Observed R99p, derived from IMERG V07 [35] for the 2001-2023 period. **(B, C)** As in **(A)**, but for the 10-member ensemble mean of CESM-HR and CESM-LR, respectively. **(D)** **(E)** As in **(A)**, but for the multi-model ensemble mean of 9 HighResMIP models and 35 CMIP6 models, respectively. The global mean R99p is 46.6 mm/day, 46.5 mm/day, 25.9 mm/day, 46.4 mm/day, and 39.5 mm/day, for IMERG V07, CESM-HR, CESM-LR, HighResMIP, and CMIP6, respectively. R99p is firstly computed on the native grid first and then interpolated to a common 1° × 1°.


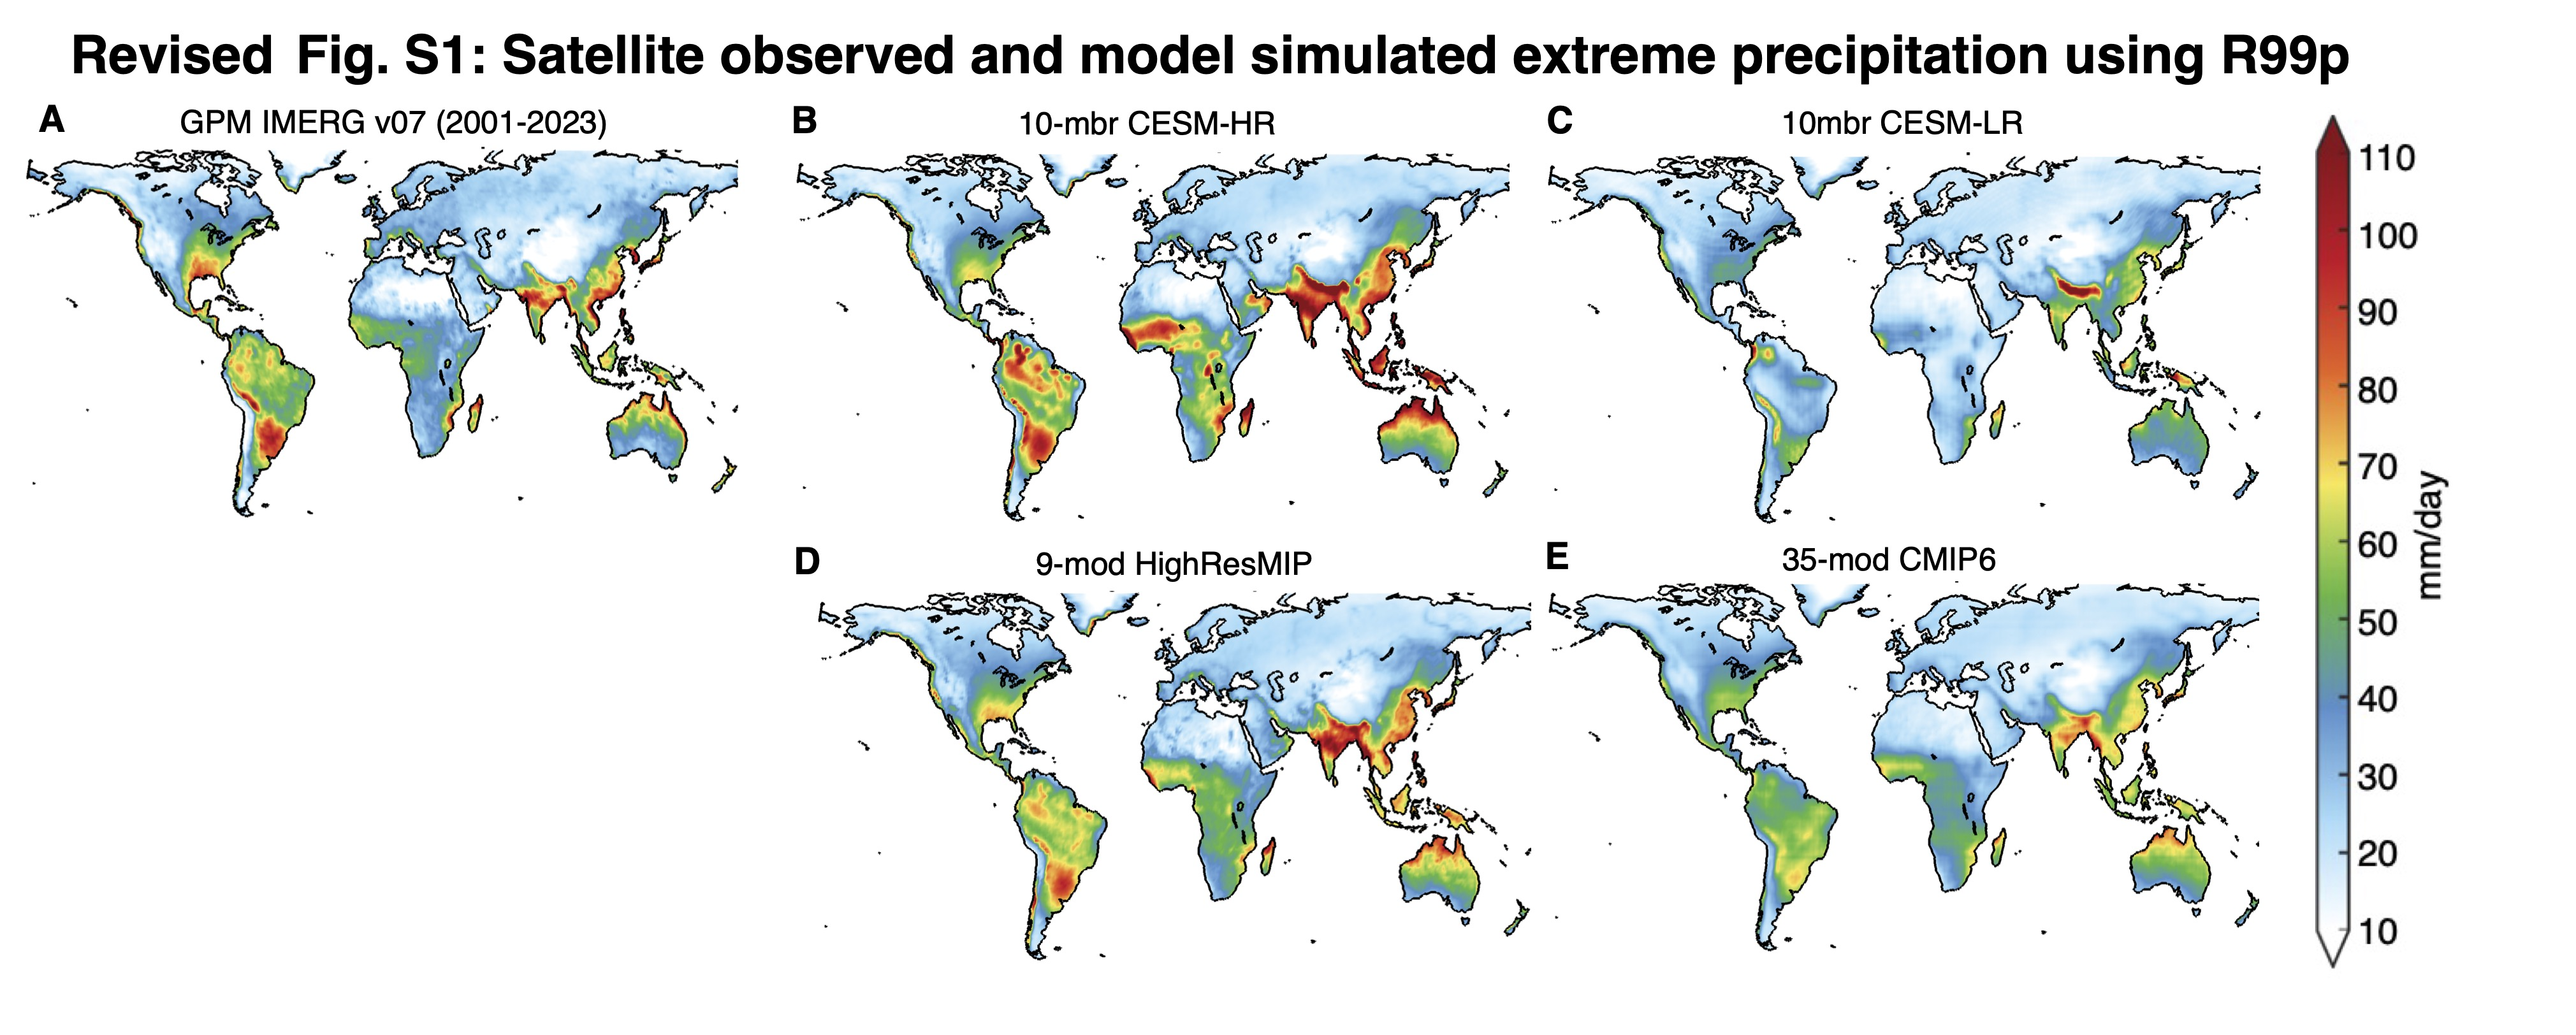


**Fig. S3: Comparison of observed and simulated R99p using conservative interpolation method.** Similar to Figure S2, but using conservative interpolation method to remap all data to a common 1° × 1° grid before computing R99p. The global mean R99p is 37.3 mm/day, 41.3 mm/day, 28.1 mm/day, 38.8 mm/day, and 34.2 mm/day, for IMERG V07, CESM-HR, CESM-LR, HighResMIP, and CMIP6, respectively.

**
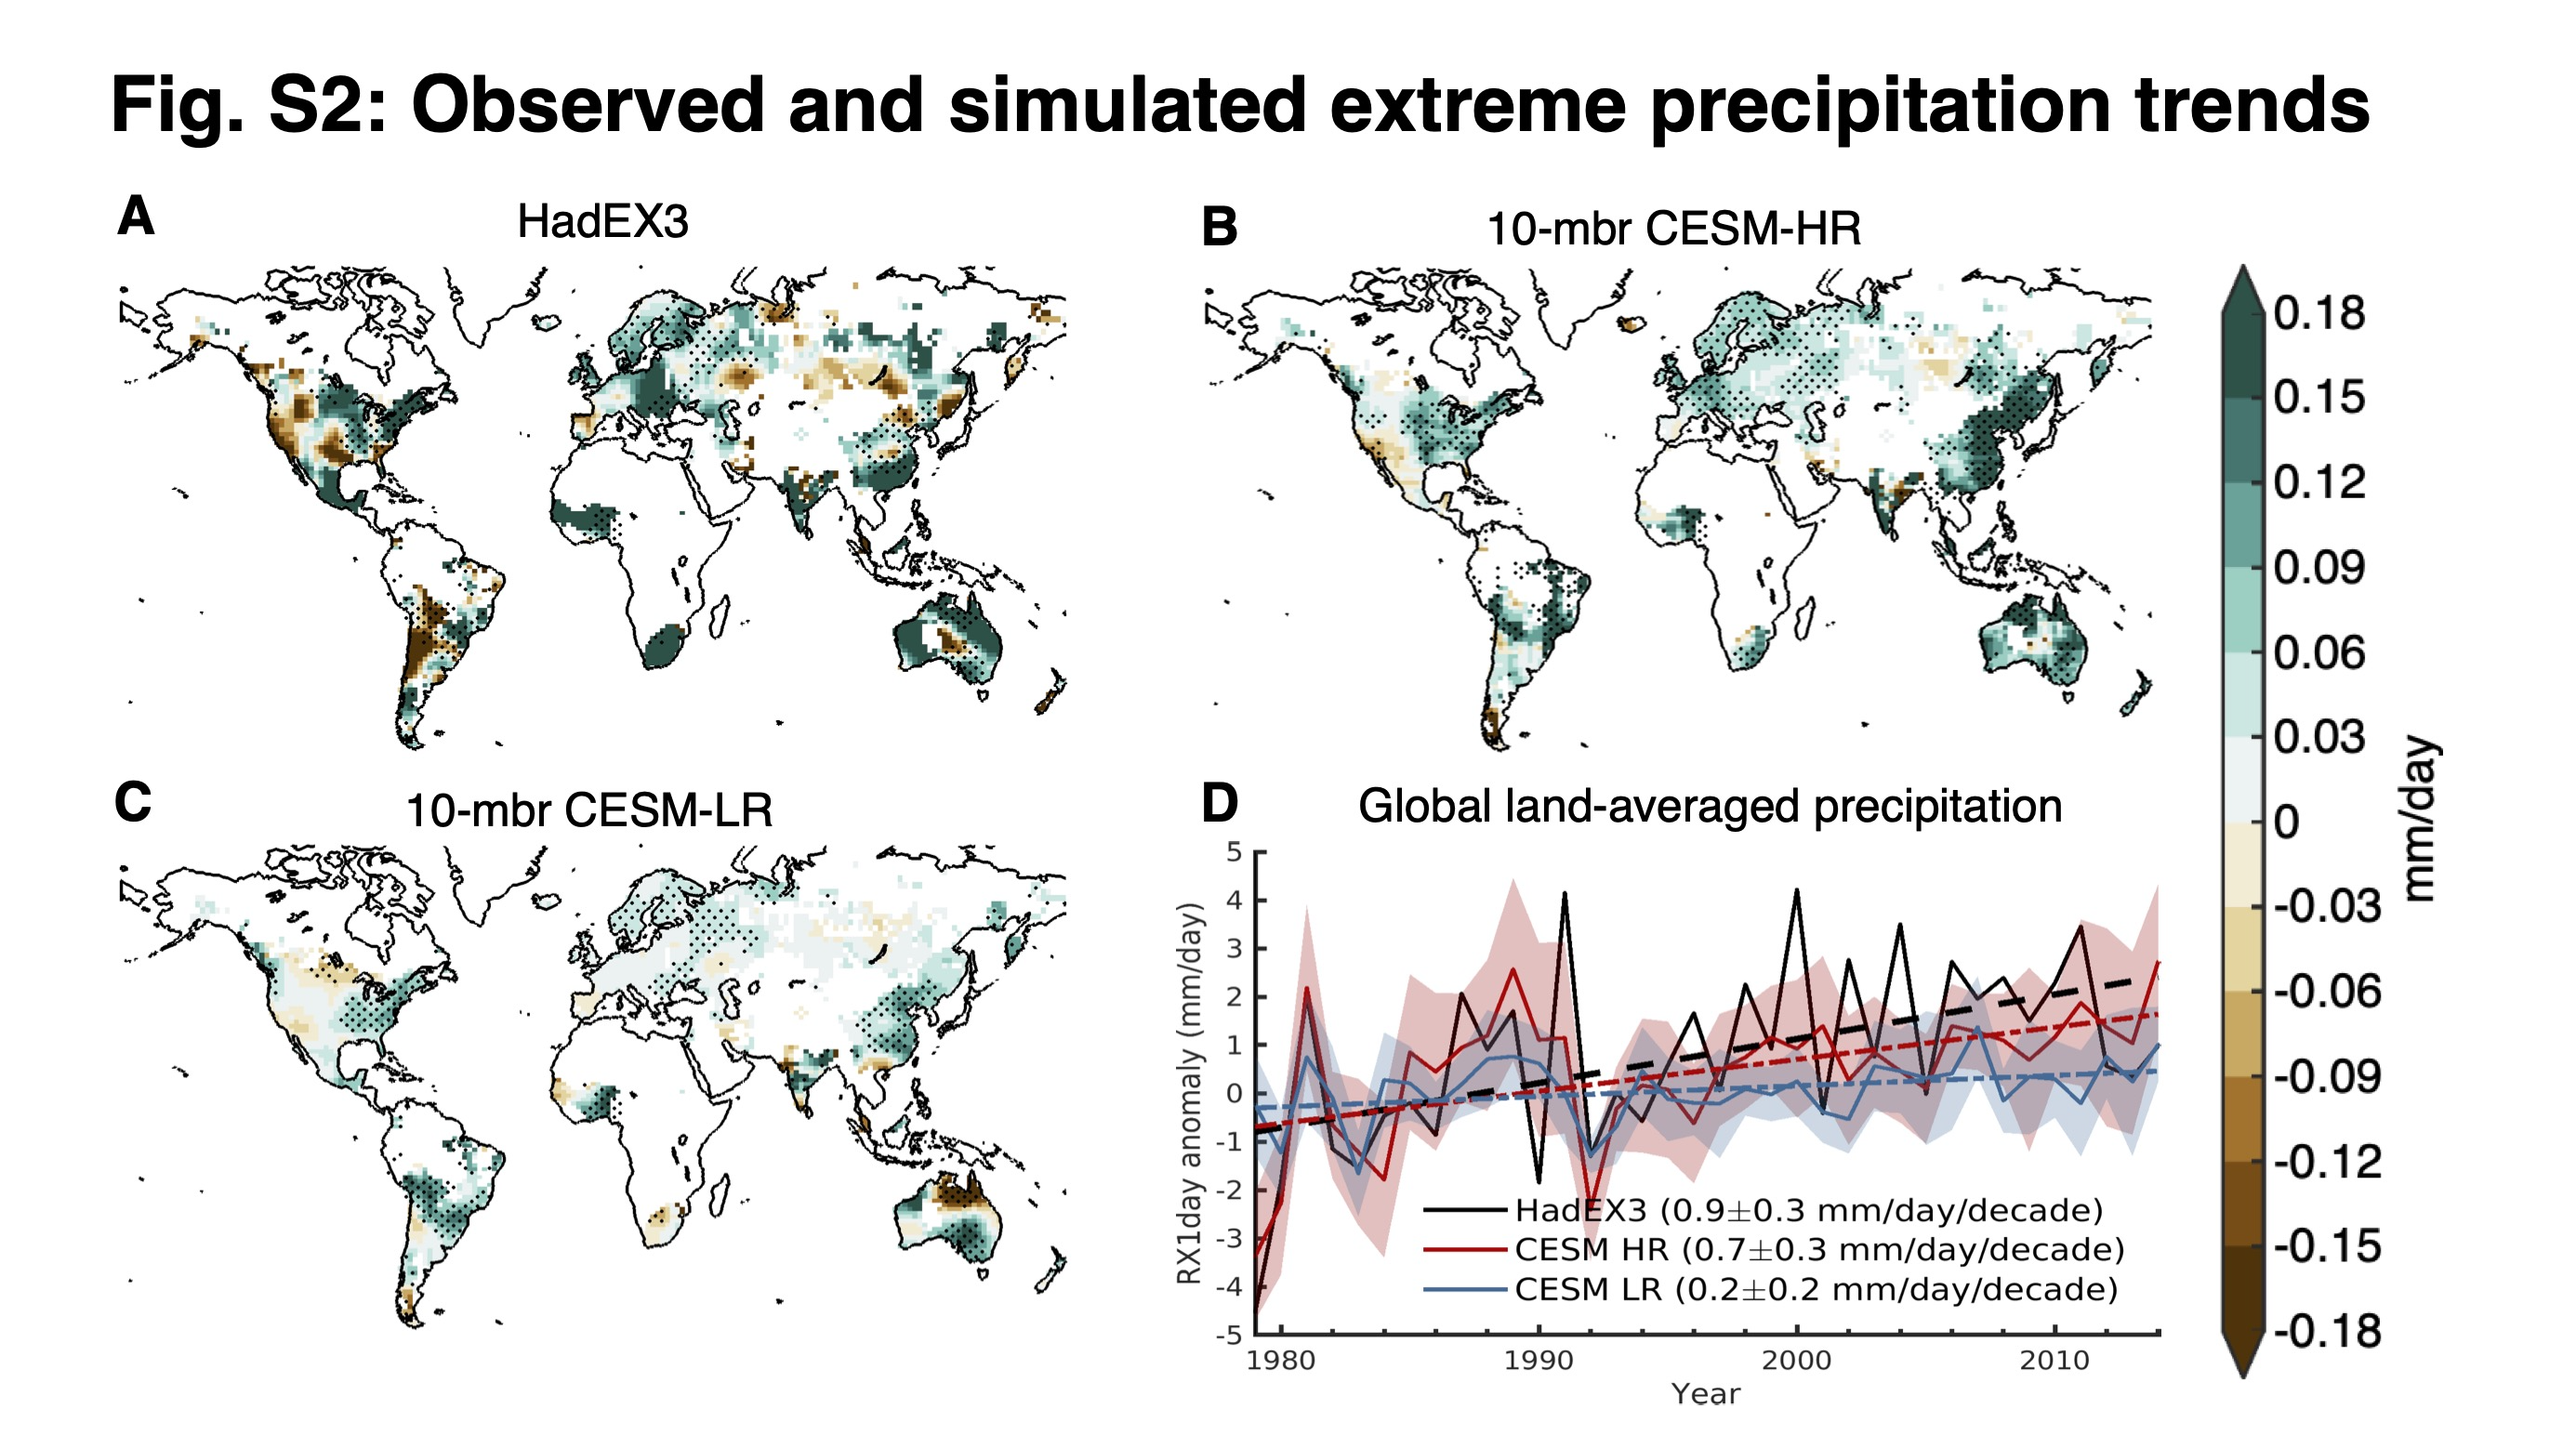
**

**Fig. S4: Observed and simulated Rx1day trends. (A)** Rx1day trend from HadEX3, with stippling indicating regions where the trend is statistically significant at the 95% confidence level based on a Mann-Kendall test. **(B)** As in **(A)**, but for the ensemble-mean of CESM-HR. **(C)** As in **(A)**, but for ensemble-mean of CESM-LR. **(D)** Rx1day anomalies averaged over global land relative to the 1950-2014 mean (solid) and the corresponding trends (dashed) from HadEX3 (black), CESM-HR (red), CESM-LR (blue), with shading representing inter-ensemble spread. The numbers show the trend value for HadEX3 (0.9±0.3 mm/day/decade), CESM-HR (0.7±0.3 mm/day/decade), and CESM-LR (0.2±0.2 mm/day/decade), respectively, calculated for the 1979-2014 period. Observed trend uncertainty is estimated using R-squared, while model trend uncertainties are based on the standard deviation of ensemble spread.


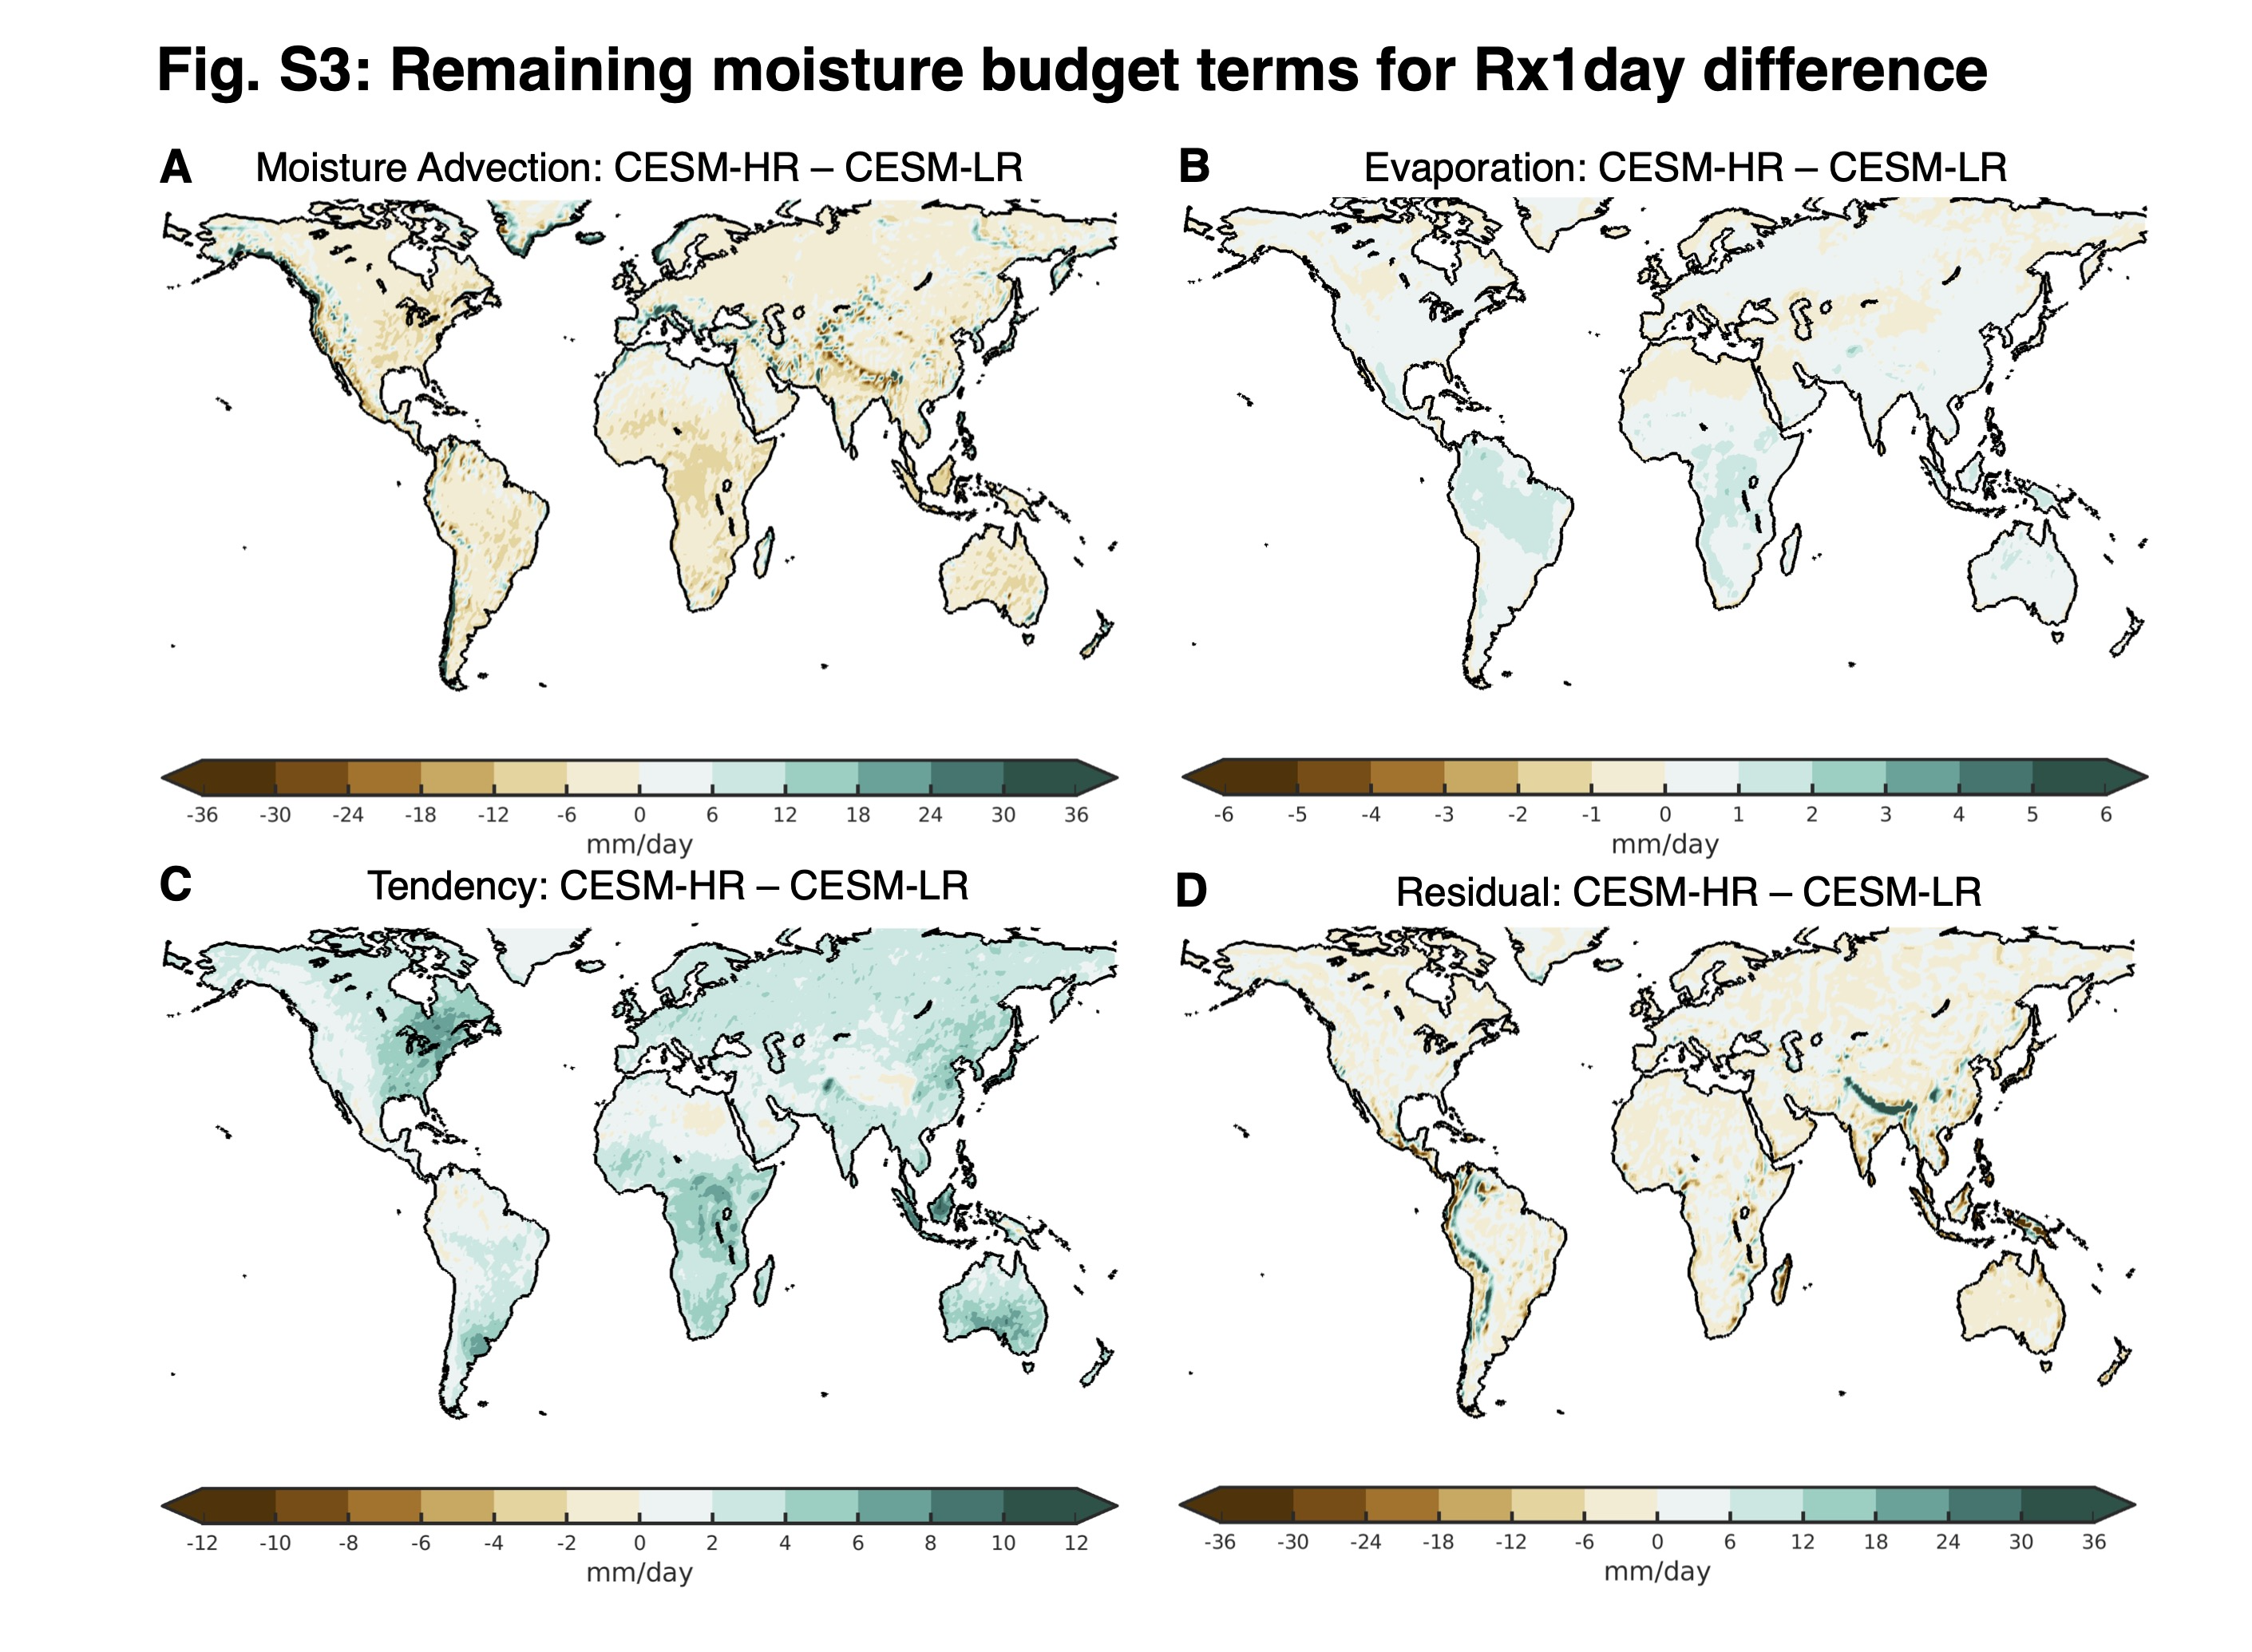


**Fig. S5: Remaining moisture budget terms for Rx1day difference between CESM-HR and CESM-LR. (A)** Contribution to the Rx1day difference between CESM-HR and CESM-LR from differences in moisture advection (*Ma*; -{***u***⋅∇q}). **(B)** As in **(A)**, but showing the contribution from differences in evaporation (*E*). **(C)** As in **(A)**, but showing the contribution from differences in moisture tendency (*Mt*; ∂/∂t{q}). **(D)** As in **(A)**, but showing the contribution from the residual term. Note that different color scales are used for each term. Together with the dynamical tendency shown in Fig.2E and the thermodynamical tendency shown in Fig. 2F, these terms collectively describe the moisture budget contributing to the Rx1day difference between CESM-HR and CESM-LR. Among these terms, the dynamical tendency is clearly the most dominant process.

**
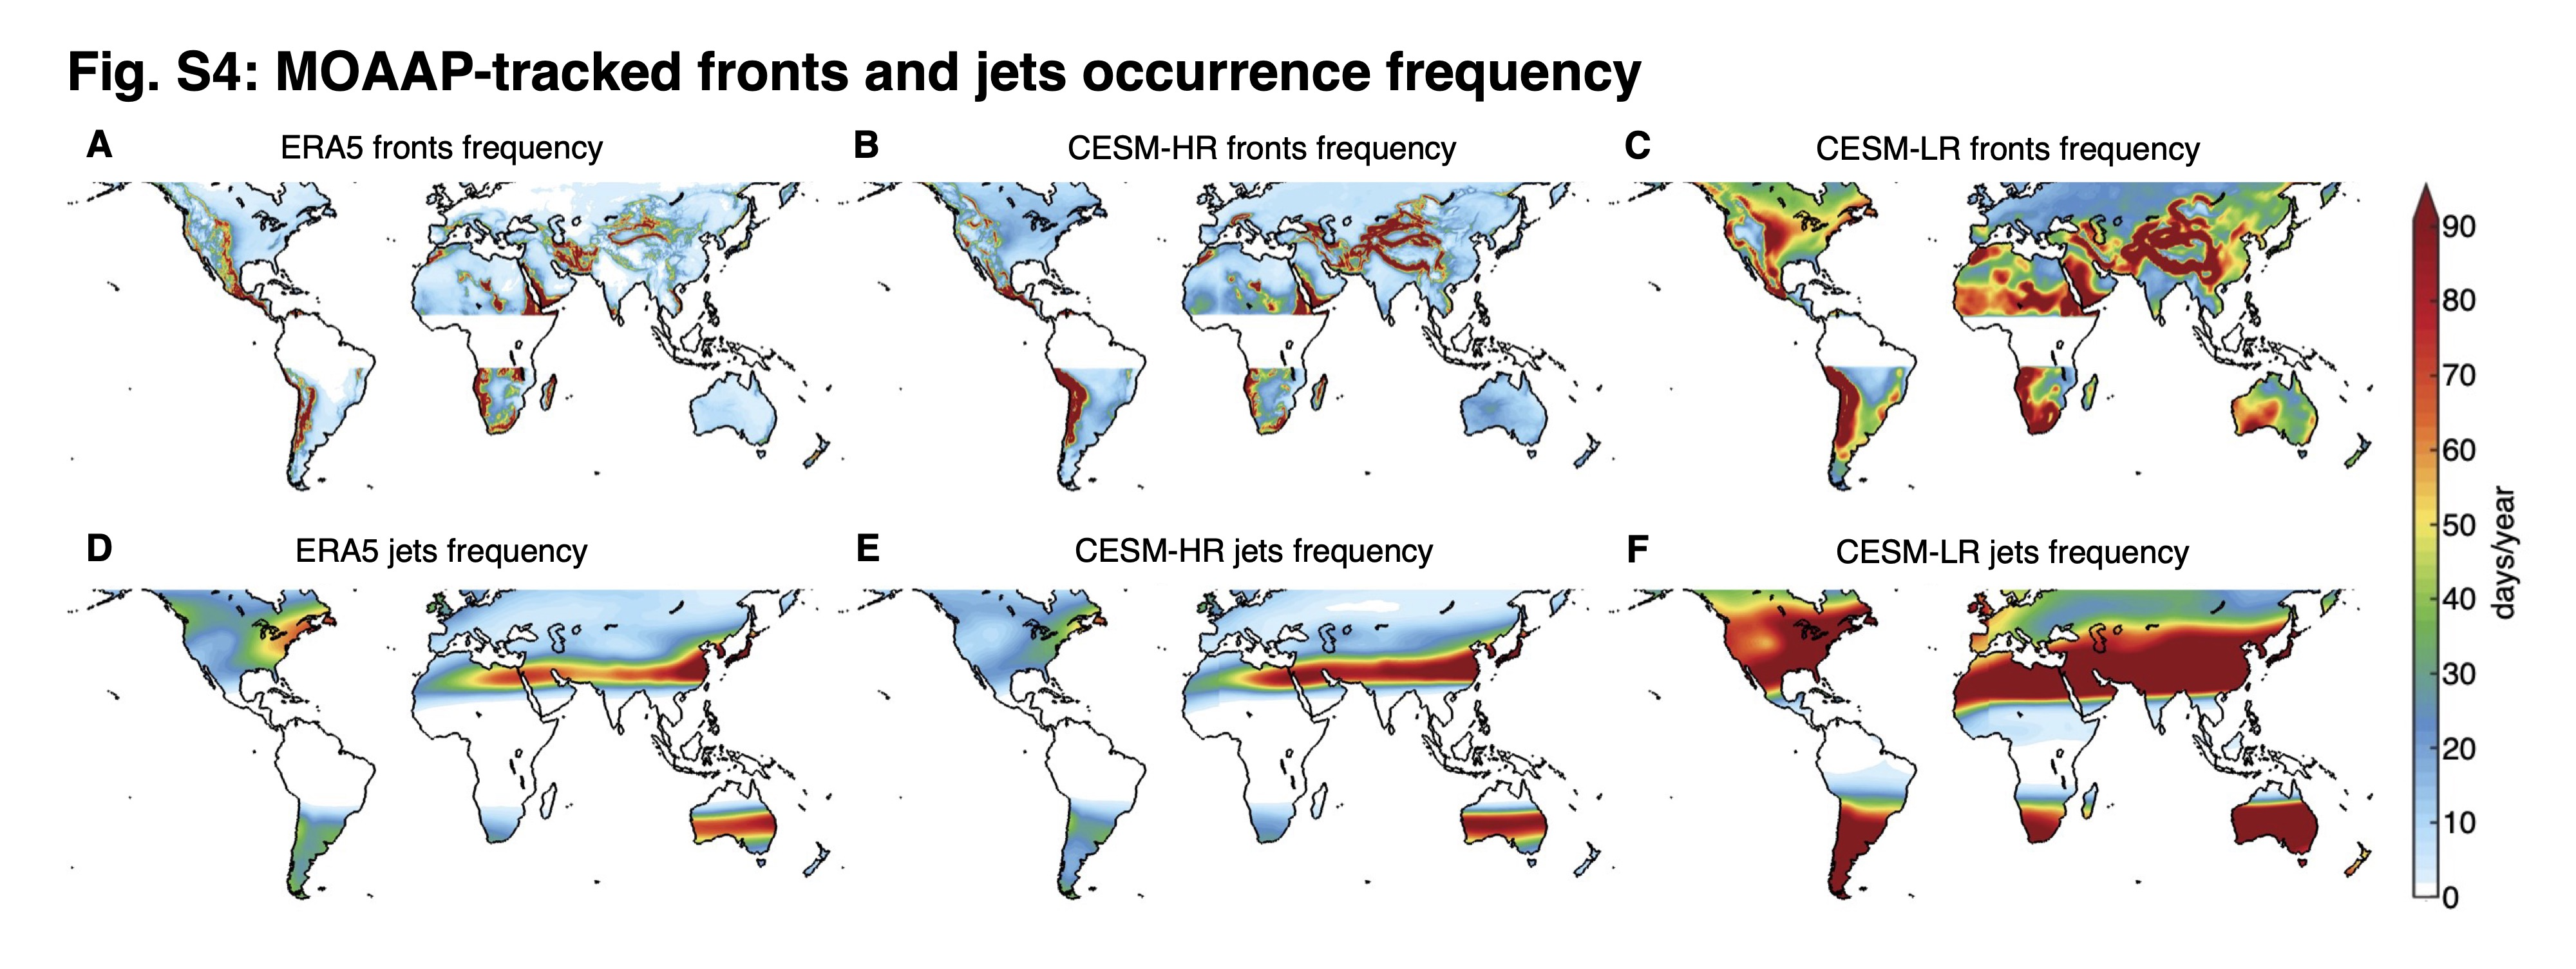
**

**Fig. S6: MOAAP-tracked fronts and jets occurrence frequency.** (**A**) Occurrence frequency (days/year) for MOAAP-tracked fronts from ERA5. **(B)**, As in **(A)**, but for tracked fronts from CESM-HR. **(C)** As in **(A)**, but for tracked fronts from CESM-LR. **(D)**, Occurrence frequency (days/year) for MOAAP-tracked jets from ERA5. **(E)** As in **(D),** but for tracked jets from CESM-HR. **(F)** As in **(D)**, but for tracked jets from CESM-LR. To be consistent with tracked MCSs shown in Fig. 3, the spatial maps are shown between 60°S and 60°N.

**
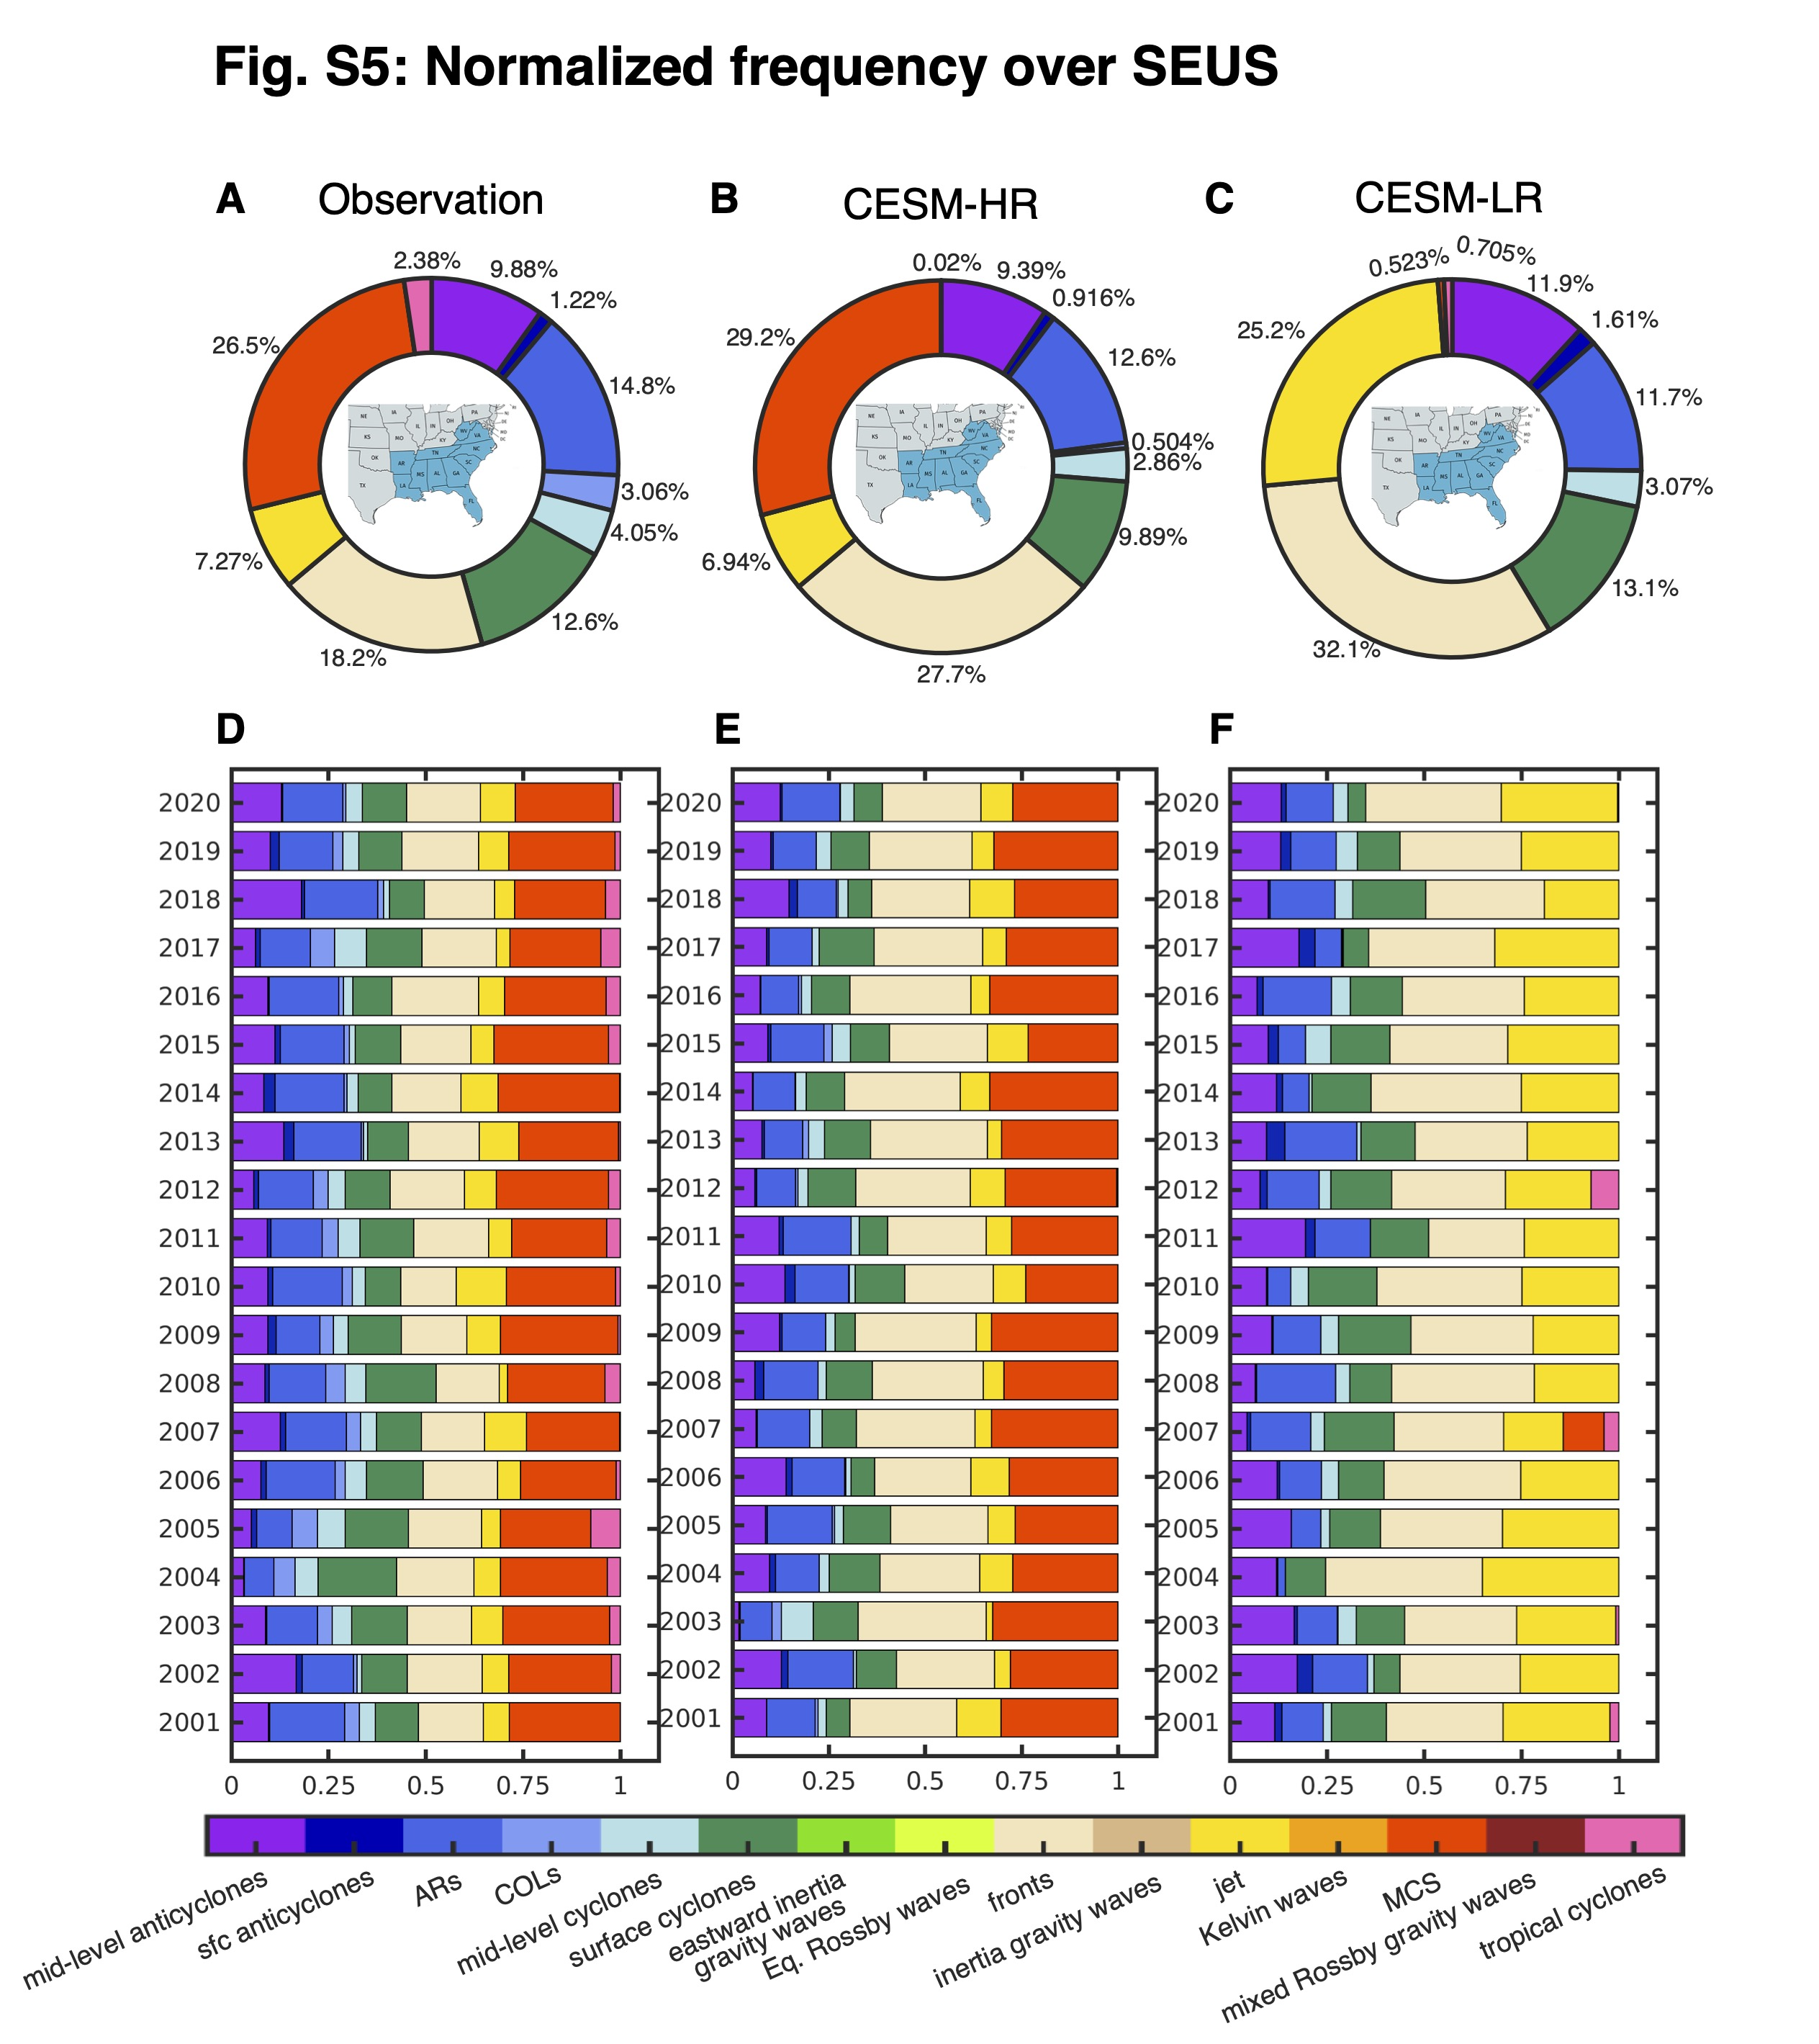
**

**Fig. S7: Normalized frequency over SEUS. (A)** Normalized occurrence frequency (%) of tracked atmospheric phenomena averaged over 2001-2020 for SEUS in observations, **(B)** As in **(A)**, but for CESM-HR. **(C)** As in **(A)**, but for CESM-LR. (**D**) Stacked bar plot of normalized occurrence frequency (%) of tracked phenomena over SEUS within the 24-hour window for each annual Rx1day event from 2001 to 2020 in observations. **(E)**, As in **(D)**, but for CESM-HR. **(F)** As in **(D)**, but for CESM-LR. SEUS is shaded in blue on the map in (**A**-**C)**.


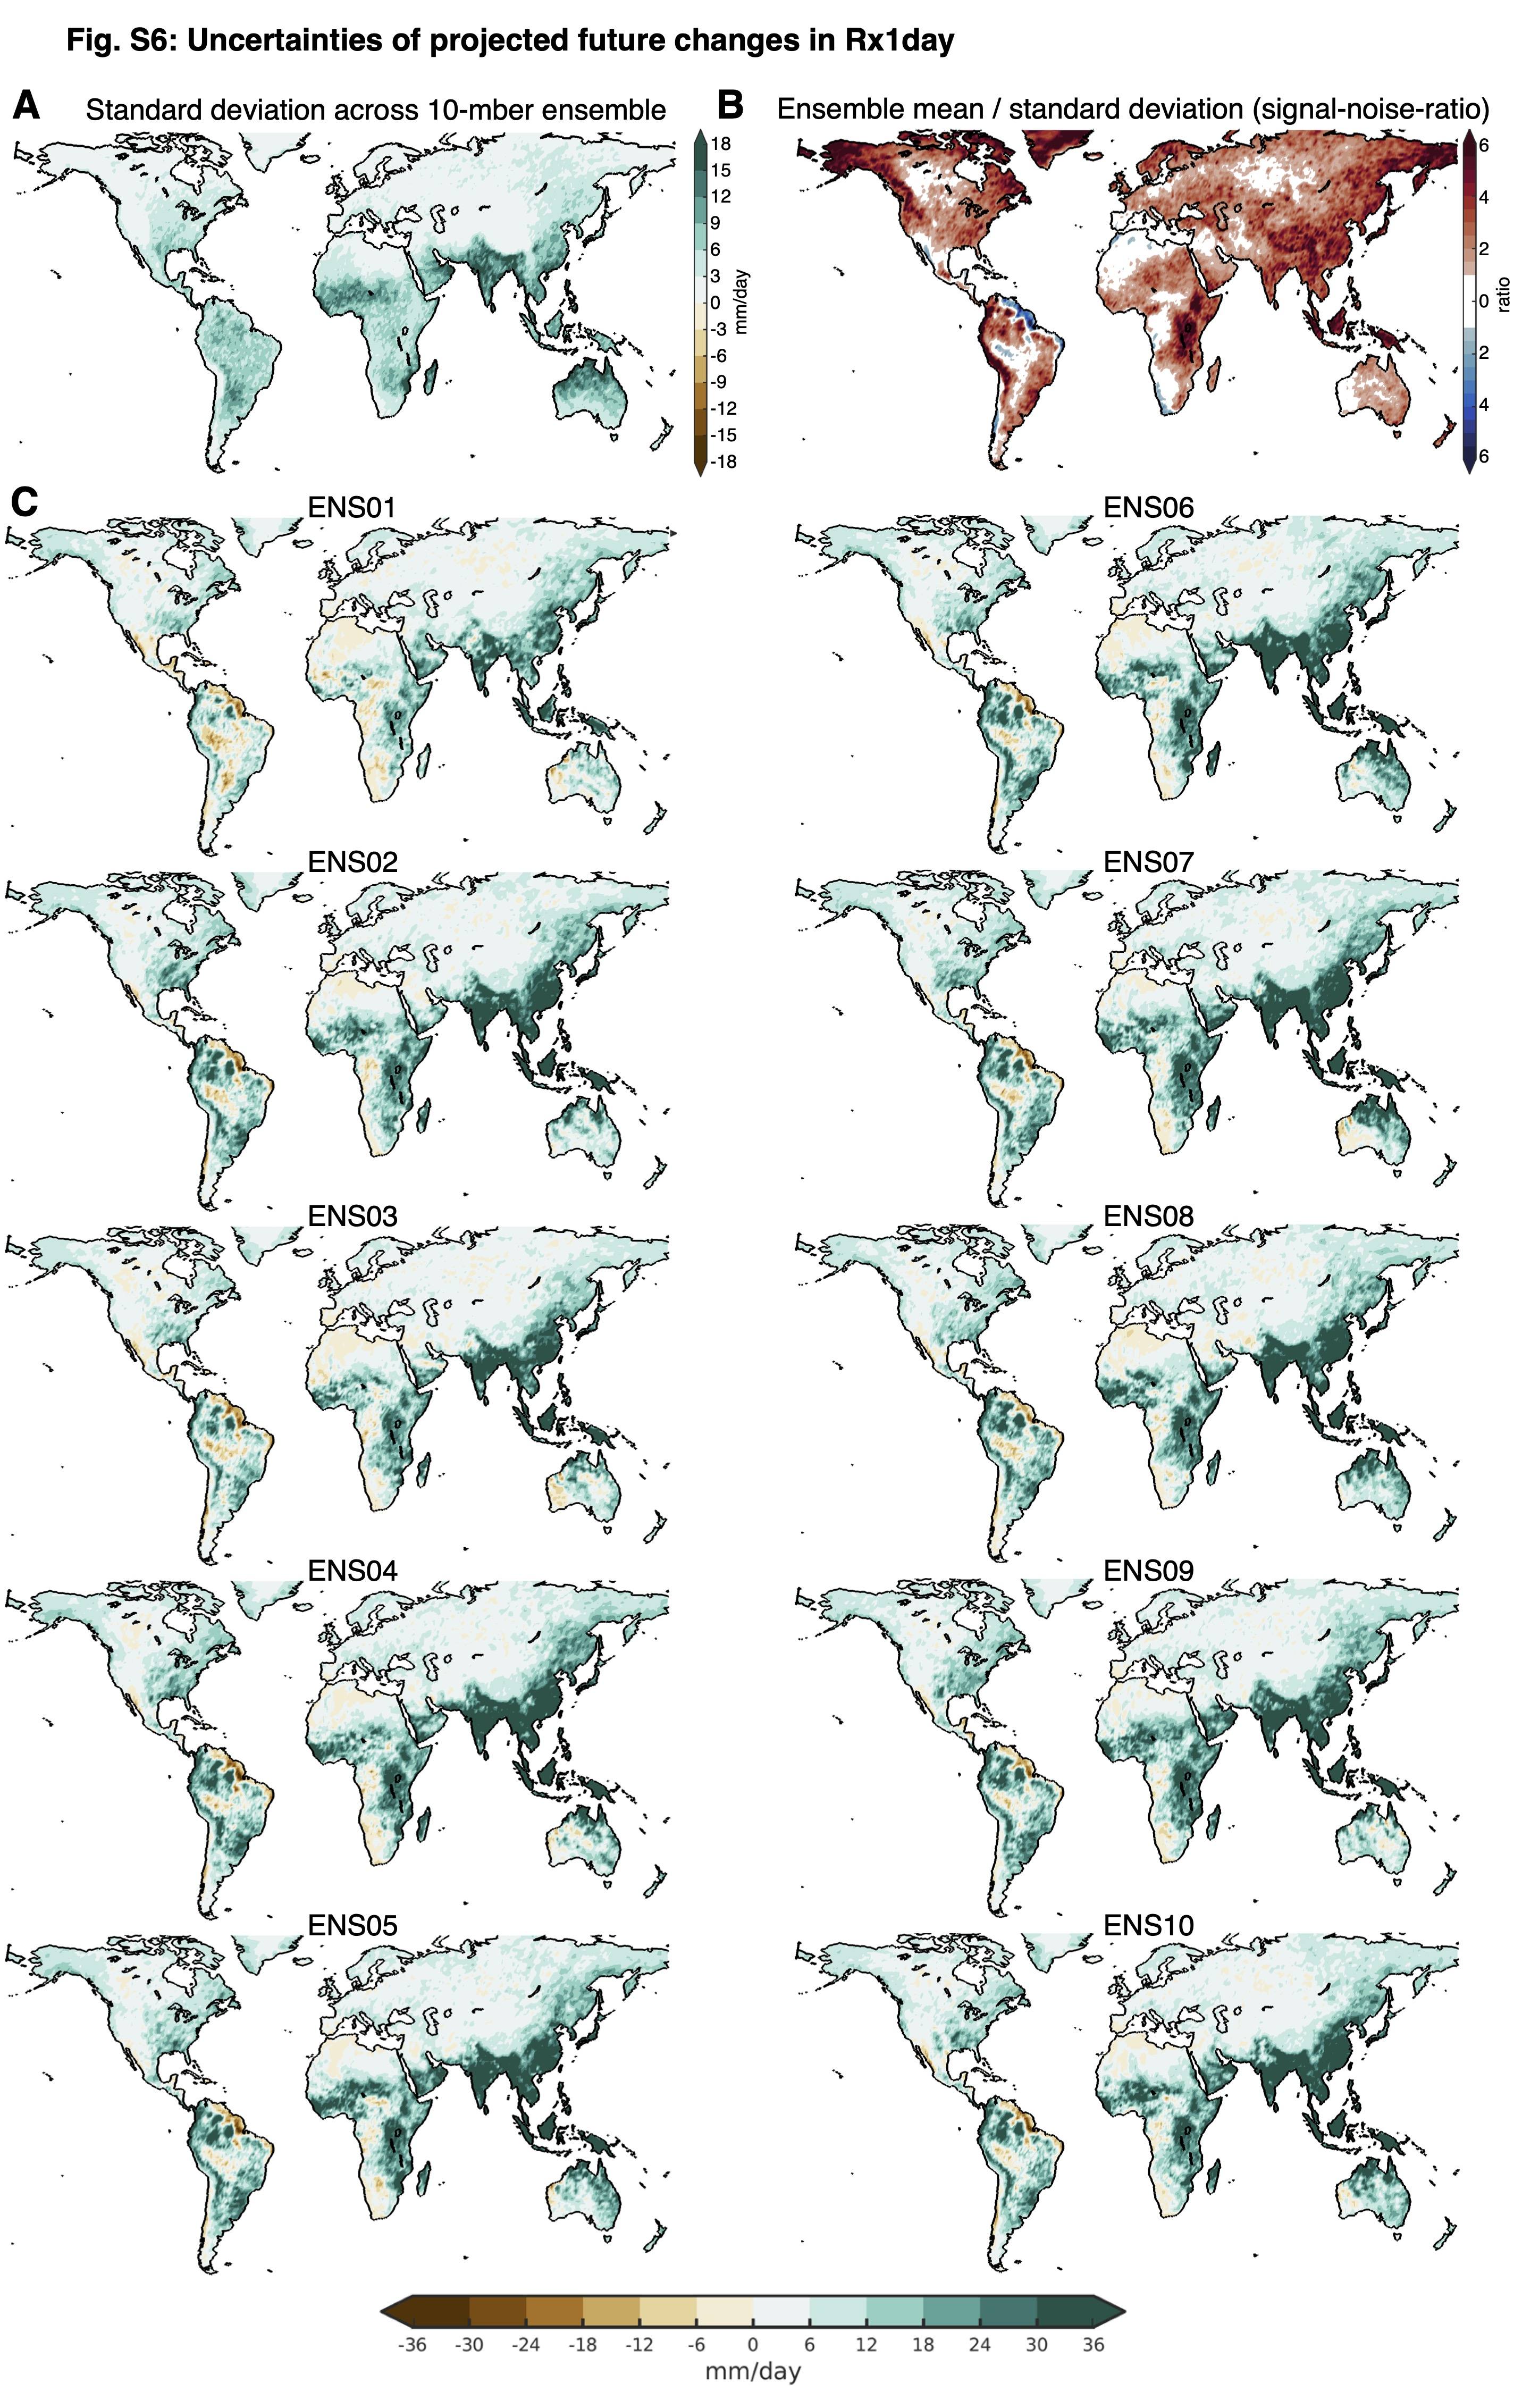


**Fig. S8: Uncertainty quantification for projected Rx1day changes in CESM-HR.** (**A**) Ensemble spread meansured by standard deviation (mm/day) of the 10 CESM-HR ensemble members, **(B)** Signal-to-noise ratio, defined as the ratio of the CESM-HR ensemble mean to its ensemble standard deviation, **(C)** Projected Rx1day changes (mm/day) calculated as the difference the future (2071-2100) and present (1981-2010) periods for each of the 10 CESM-HR ensemble members.


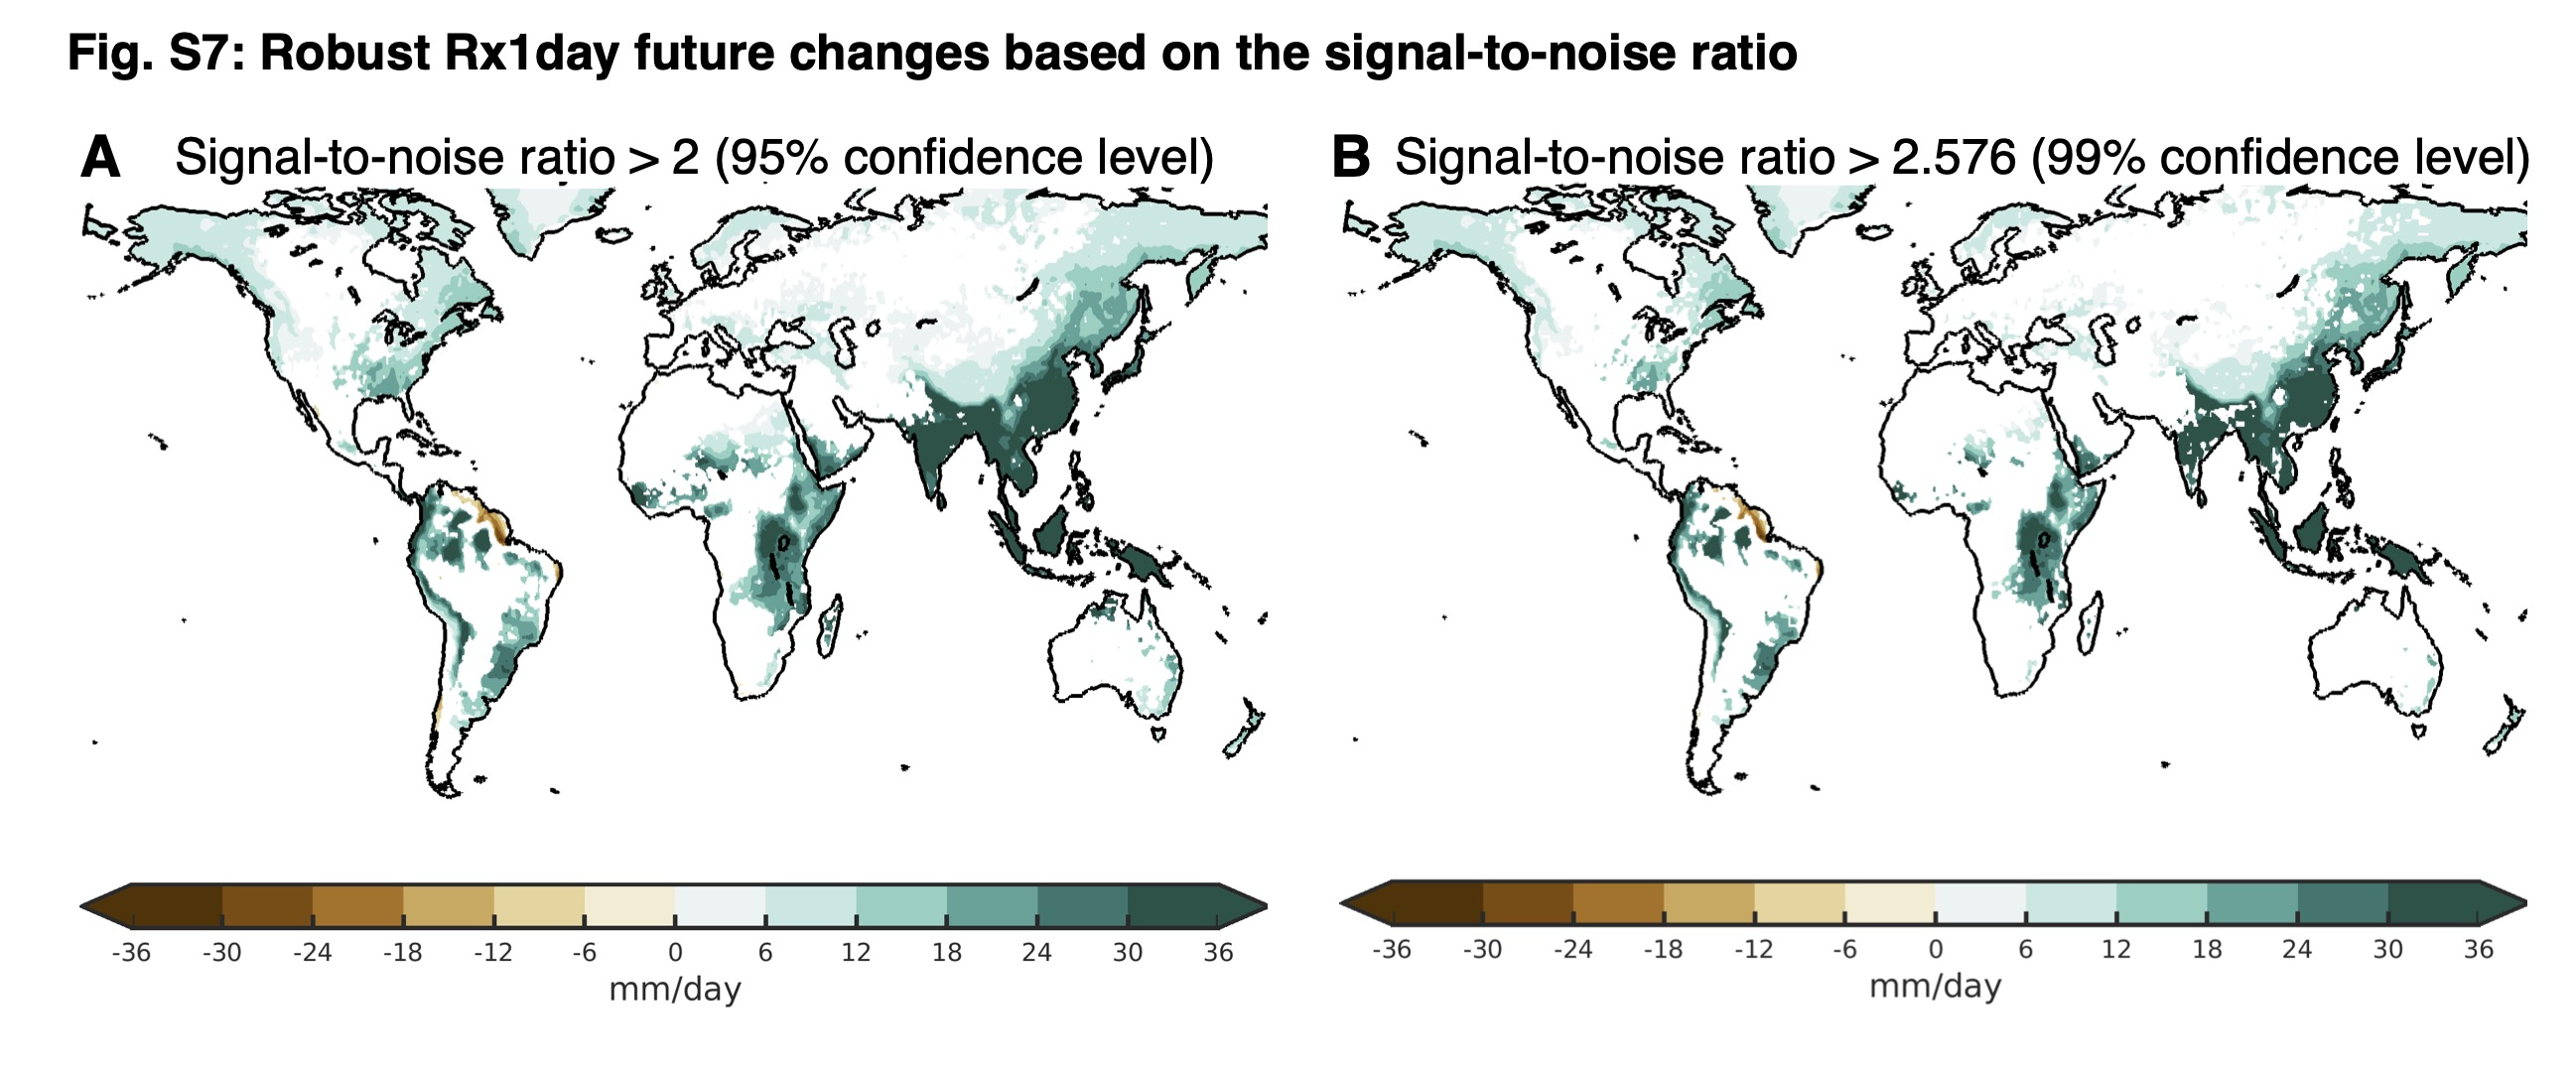


**Fig. S9 Projected Rx1 changes exceeding signal-to-noise thresholds**. **(A)** Projected Rx1day changes (mm/day) for the future period (2071-2100) relative to the present period (1981-2010) over regions where the signal-to-noise ratio exceeds the 95% confidence level (SNR > 2), **(B)** As in a, but for regions where the signal-to-noise ratio exceeds the 99% confidence level (SNR > 2.576).

| Model Name | Horizontal Resolution (lon. by lat. in degrees) | Institution |
| --- | --- | --- |
| ACCESS-CM2 | 1.9° × 1.3° | Commonwealth Scientific and Industrial Research Organisation (CSIRO), Australia |
| ACCESS-ESM1-5 | 1.9° × 1.2° |
| BCC-CSM2-MR | 1.1° × 1.1° | Beijing Climate Center, China |
| BCC-ESM1 | 2.8° × 2.8° |
| CanESM5 | 2.8° × 2.8° | Canadian Centre for Climate Modelling and Analysis, Canada |
| CESM2-FV2 | 1.3° × 0.9° | National Science Foundation National Center for Atmospheric Research, USA |
| CESM2 | 1.3° × 0.9° |
| CESM2-WACCM-FV2 | 1.3° × 0.9° |
| CESM2-WACCM | 1.3° × 0.9° |
| CNRM-CM6-1 | 1.4° × 1.4° | National Center for Meteorological Research, Météo-France and CNRS laboratory, France |
| CNRM-CM6-1-HR | 0.5° × 0.5° |
| CNRM-ESM2-1 | 1.4° × 1.4° |
| EC-Earth3 | 0.7° × 0.7° | European Earth System Model, EU |
| EC-Earth3-Veg | 0.7° × 0.7° |
| FGOALS-f3-L | 1.3° × 1° | Chinese Academy of Sciences, China |
| FGOALS-g3 | 2° × 2.3° |
| GFDL-CM4 | 1° × 1° | U.S. Department of Commerce/National Oceanic and Atmospheric Administration (NOAA)/ Geophysical Fluid Dynamics Laboratory (GFDL), USA |
| GFDL-ESM4 | 1.3° × 1° |
| HadGEM3-GC31-LL | 1.9° × 1.3° | Met Office Hadley Centre, United Kingdom |
| HadGEM3-GC31-MM | 0.8° × 0.6° |
| INM-CM4-8 | 2° × 1.5° | Institute for Numerical Mathematics, Russia |
| INM-CM5-0 | 2° × 1.5° |
| IPSL-CM6A-LR | 2.5° × 1.3° | Institut Pierre-Simon Laplace, France |
| MIROC6 | 1.4° × 1.4° | Japan Agency for Marine-Earth Science and Technology (JAMSTEC), University of Tokyo (UT), National Institute for Environmental Studies (NIES) and RIKEN Center for Computational Science (R-CCS), Japan |
| MIROC-ES2L | 2.8° × 2.8° |
| MPI-ESM-1-2-HAM | 1.9° × 1.9° | Max Planck Institute for Meteorology, Germany |
| MPI-ESM1-2-HR | 0.9° × 0.9° |
| MPI-ESM1-2-LR | 1.9° × 1.9° |
| MRI-ESM2-0 | 1.1° × 1.1° | Meteorological Research Institute, Japan |
| NESM3 | 1.9° × 1.9° | Nanjing University of Information Science and Technology, China |
| NorESM2-LM | 2.5° × 1.9° | Norwegian Meteorological Institute, Norway |
| NorESM2-MM | 1.1° × 0.9° |
| SAM0-UNICON | 1.3° × 0.9° | Seoul National University, South Korea |
| TaiESM1 | 1.3° × 0.9° | Research Center for Environmental Changes, Academia Sinica, Taiwan, |
| UKESM1-0-LL | 1.9° × 1.3° | Met Office Hadley Center, United Kingdom |

**Table S1: 35 CMIP6 models used for extreme precipitation computation**

**Table S2: 9 HighResMIP models used for extreme precipitation computation**

| Model Name | Horizontal Resolution (lon. by lat. in degrees) | Institution |
| --- | --- | --- |
| CESM-HR | 0.25° × 0.25° | National Science Foundation National Center for Atmospheric Research, USA |
| CMCC-CM2-VHR4 | 0.31° ×0.23° | Euro-Mediterranean Centre on Climate Change, Italy |
| CNRM-CM6-1-HR | 0.5° × 0.5° | National Center for Meteorological Research, Météo-France and CNRS laboratory, France |
| EC-Earth3P-HR | 0.5° × 0.5° | European Earth System Model, EU |
| ECMWF-IFS-HR | 0.23° ×0.23° | European Centre for Medium-Range Weather Forecasts (ECMWF) |
| FGOALS-f3-H | 0.25° × 0.25° | Chinese Academy of Sciences, China |
| GFDL-CM4-HR | 0.5° × 0.5° | U.S. Department of Commerce/National Oceanic and Atmospheric Administration (NOAA)/ Geophysical Fluid Dynamics Laboratory (GFDL), USA |
| HadGEM3-GC31-HM | 0.35° × 0.23° | Met Office Hadley Center, United Kingdom |
| MPI-ESM1-2-XR | 0.47° ×0.47° | Max Planck Institute for Meteorology, Germany |
